# Supplementary material for: A Supercluster of Neutralizing Epitopes at the Interface of Ricin’s Enzymatic (RTA) and Binding (RTB) Subunits
Source: MDPI journal article supplement (doi:10.3390/toxins9120378), 2017-11-23
Supplement: s1 [file s1]

## Supplementary Materials: A Supercluster of Neutralizing Epitopes at the Interface of Ricin's Enzymatic (RTA) and Binding (RTB) Subunits

Amanda Y. Poon, David J. Vance, Yinghui Rong, Dylan Ehrbar, and Nicholas J. Mantis

Table S1. VHH-SyH7 Competition Results.

| Tier     | V <sub>H</sub> H | % Inhibition         |                    |
|----------|------------------|----------------------|--------------------|
|          |                  | Capture <sup>a</sup> | EPICC <sup>b</sup> |
| I        | V5E4             | 85 ± 0.5             | 48 ± 0.9           |
|          | RTB-B7           | 71 ± 0.3             | 96 ± 0.1           |
|          | <u>V2C11</u>     | 88 ± 0.1             | 54 ± 8.1           |
|          | V5G1             | 88 ± 0.3             | 53 ± 0.8           |
| II       | V5D1*            | 75 ± 1.5             | 89 ± 1.9           |
|          | <u>V2D4</u>      | 92 ± 0.5             | 34 ± 12.9          |
|          | V4A1             | 92 ± 0.4             | 29 ± 6.1           |
|          | V8D12            | ND <sup>c</sup>      | 45 ± 9             |
| III      | V1B4*            | 90 ± 0.4             | 86 ± 5             |
|          | V5G6*            | 86 ± 0.5             | 28 ± 1             |
|          | V5G12*           | 88 ± 0.7             | 34 ± 11            |
|          | <u>V5H2</u>      | 88 ± 1.1             | 20 ± 1.3           |
|          | V6B9             | ND                   | 16 ± 2.6           |
| Controls | V5D5             | 7                    | 8 ± 8.9            |
|          | V5H6             | 22 ± 4.1             | 7 ± 1              |

<sup>a</sup> % inhibition values determined by sandwich ELISA in which SyH7 was used as a capture antibody, adopted from Vance et al., (2017 Clin Vaccine Immunol. 10.1128/CVI.00236-17). <sup>b</sup> Competition between SyH7 and VHHs determined using biotin-ricin capture assay, as described in Materials and Methods. <sup>c</sup> ND, not determined. \* indicates V<sub>H</sub>Hs that are holotoxin-specific (i.e., recognize ricin toxin, but not either of the individual subunits, RTA or RTB).

A.

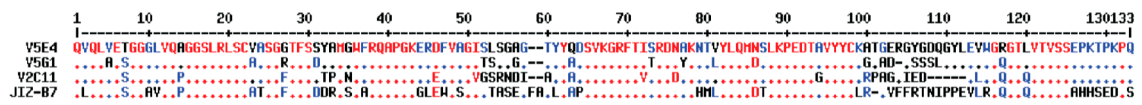

B.

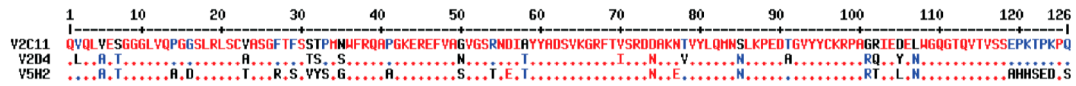

**Figure S1.** Sequence alignments of four Tier I VHHs and V2C11 family VHHs. Amino acid sequence alignment of the (A) Tier I VHHs and (B) V2C11 family. Red dots represent identical sequences and blue dots represent amino acids that are the same as the first sequence in the alignment. Red amino acids represent regions of high consensus, blue amino acids represent regions of low consensus and black amino acids are neutral. Dashes mean no amino acid in that position.
